# Supplementary material for: Chromosome-wide co-fluctuation of stochastic gene expression in mammalian cells
Source: PLOS journal article supplement (doi:10.1371/journal.pgen.1008389), 2019-09-16
Supplement: S1 (10.1371/journal.pgen.1008389.s001) [file journal.pgen.1008389.s001]

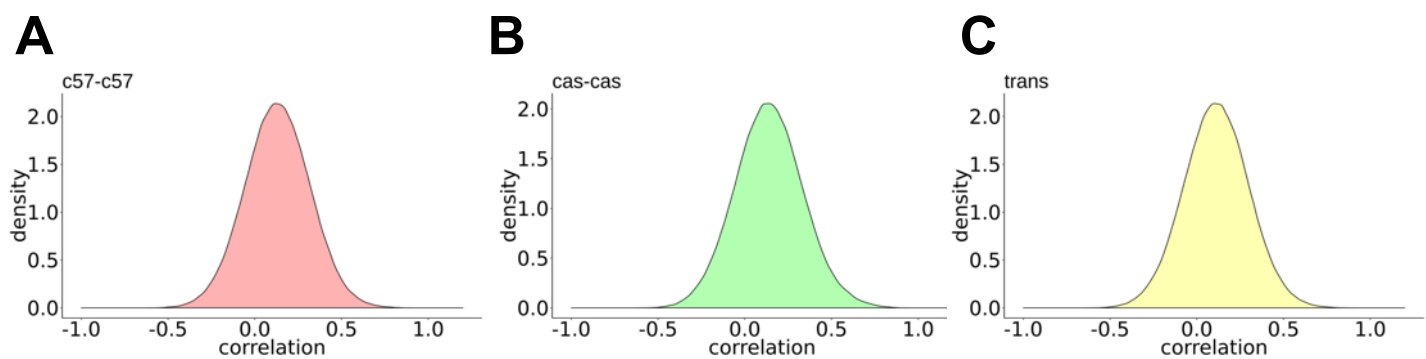

**Figure S1**
