# Supplementary material for: Chromosome-wide co-fluctuation of stochastic gene expression in mammalian cells
Source: PLOS journal article supplement (doi:10.1371/journal.pgen.1008389), 2019-09-16
Supplement: S5 (10.1371/journal.pgen.1008389.s005) [file journal.pgen.1008389.s005]

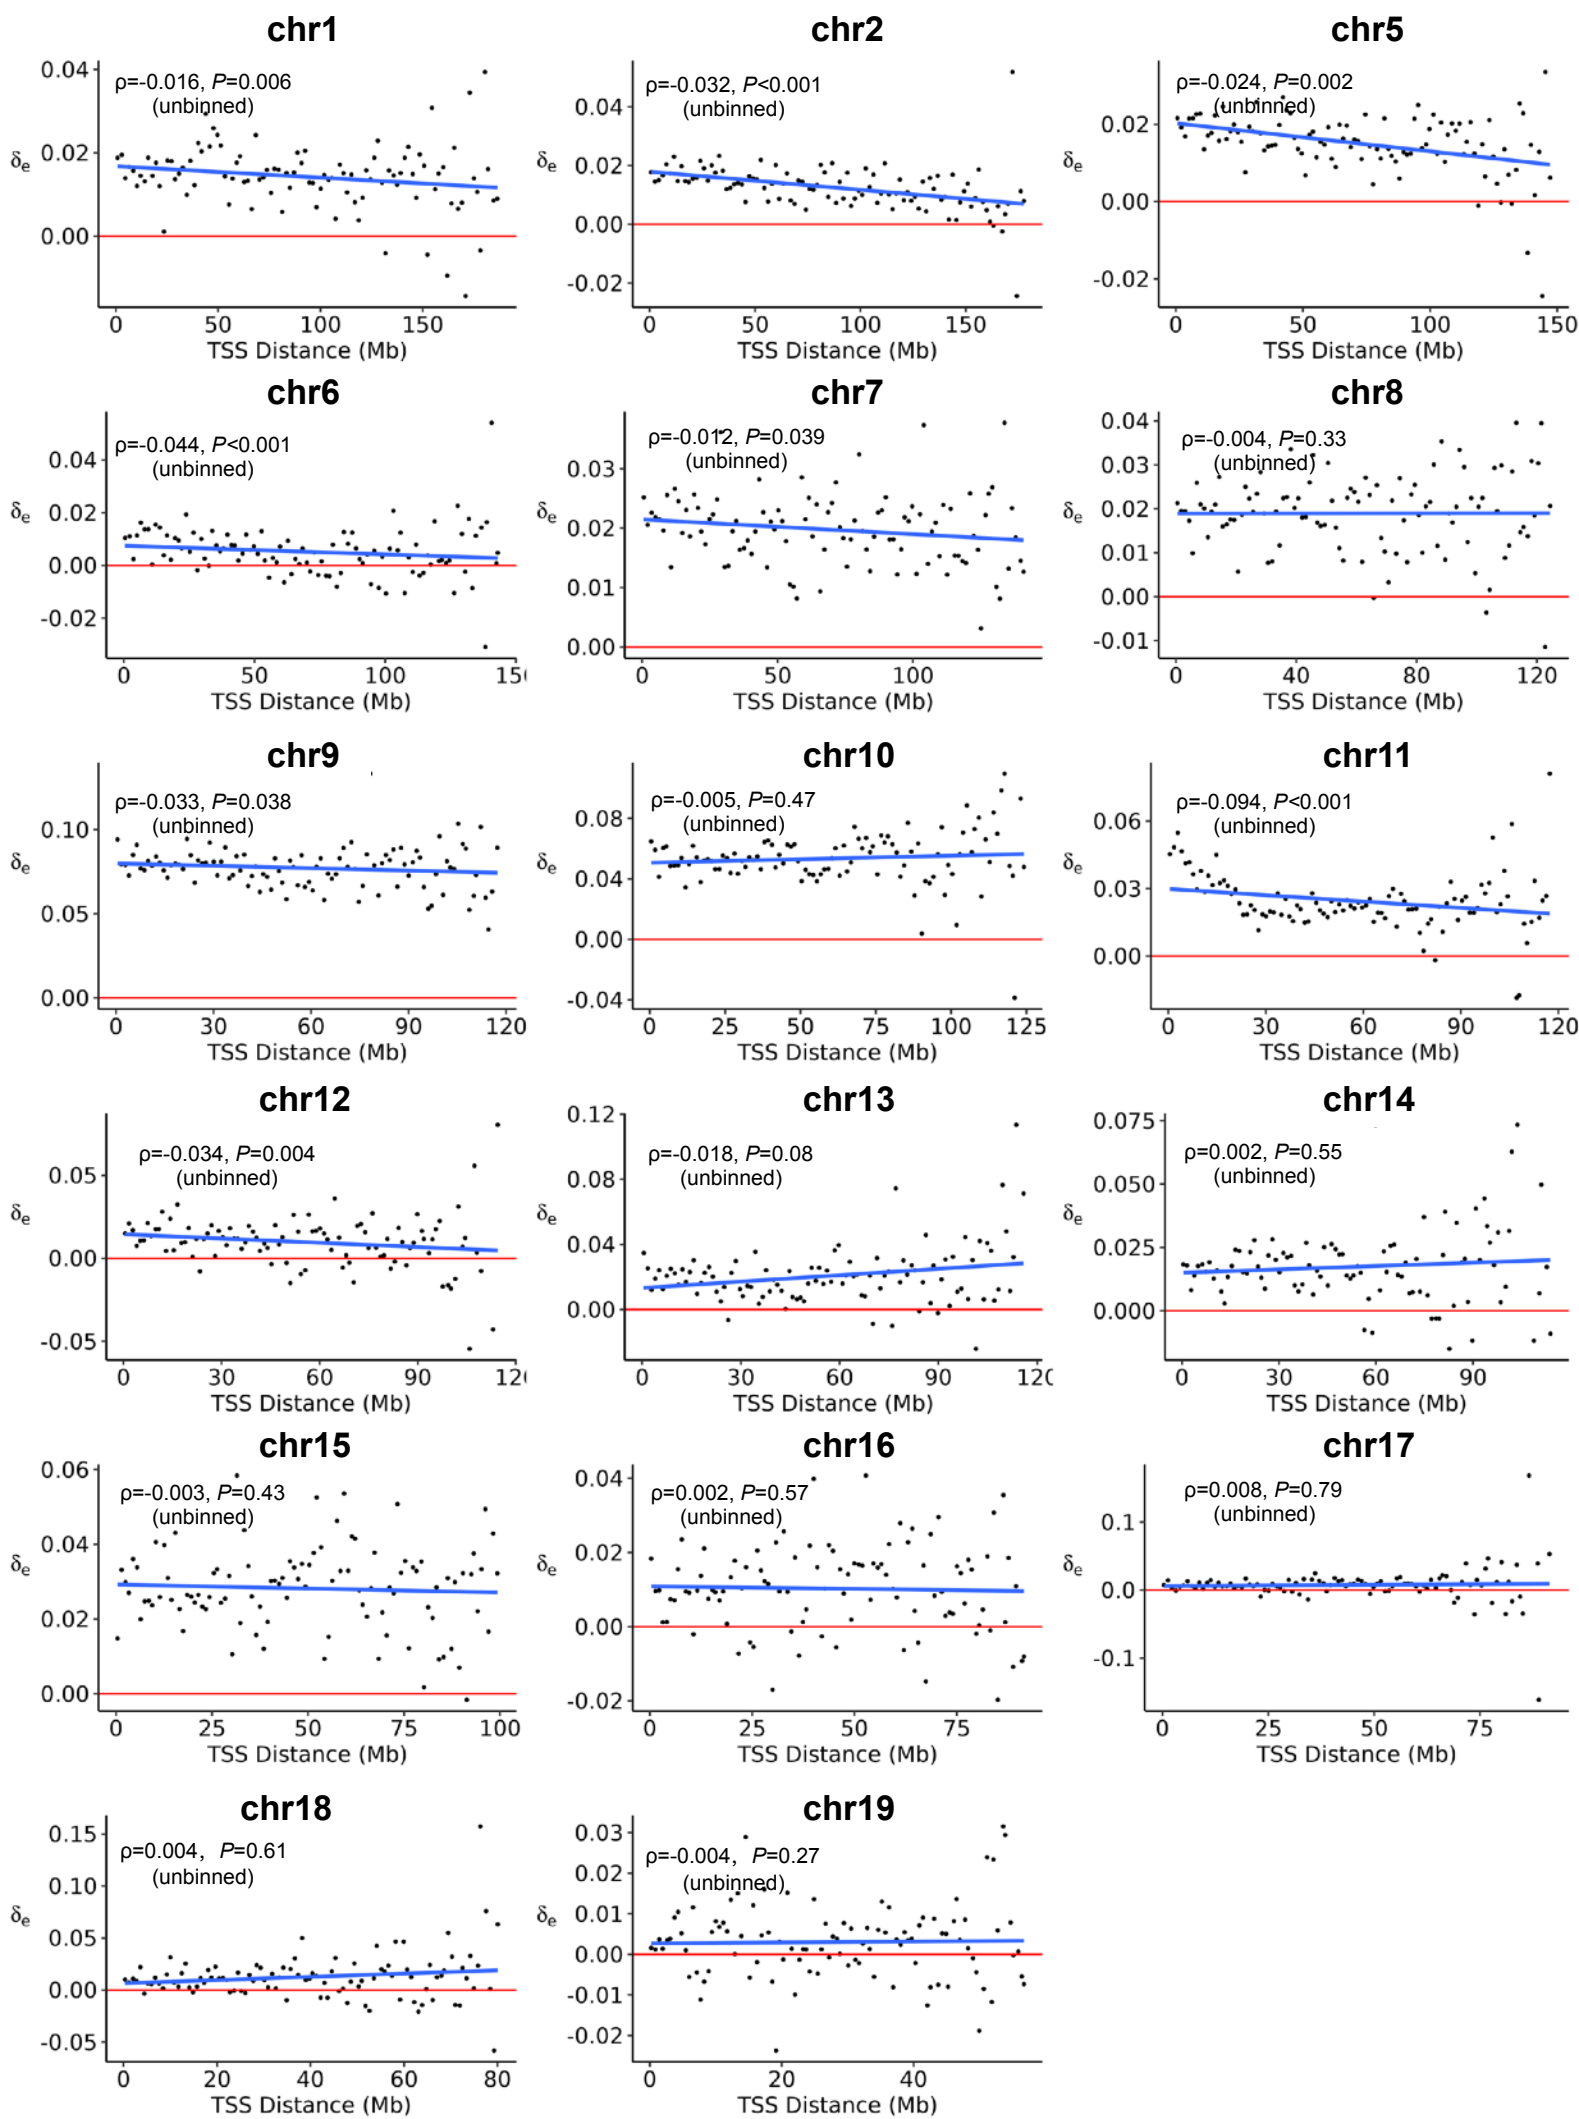

**Figure S5**
